# Supplementary material
Source: PubMed Central journal article supplement (PMC2709061)

**A**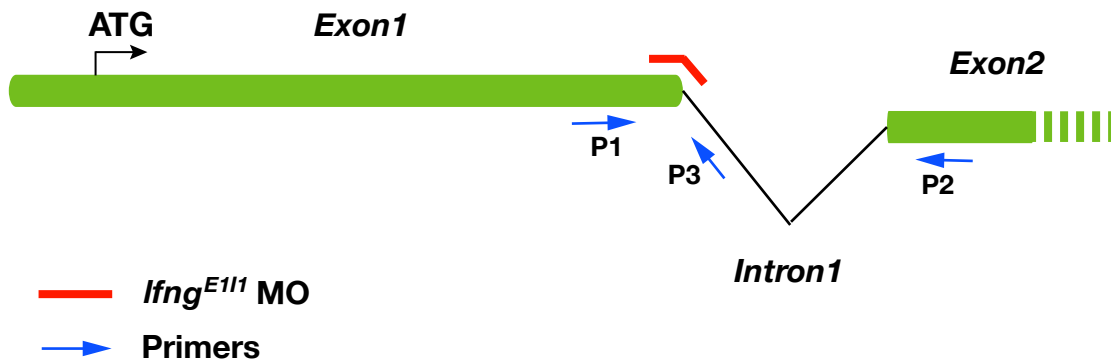**B**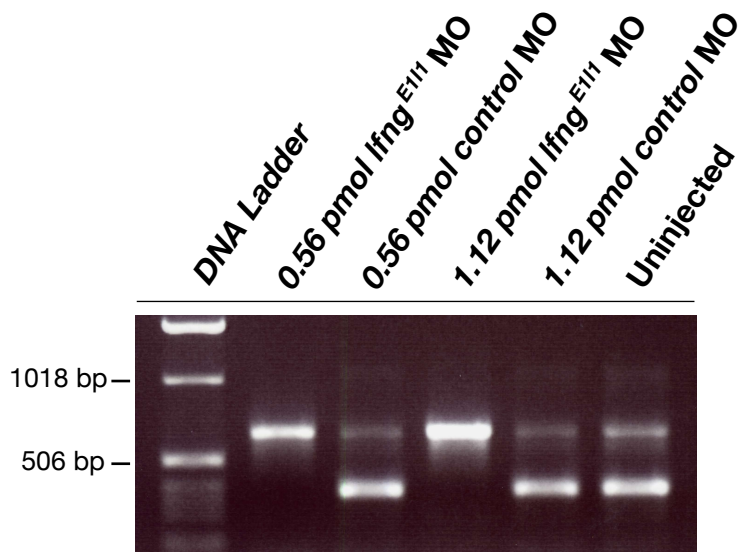

P1+P2: spliced mRNA (~370bp)

P1+P3: unspliced mRNA (~650bp)

Supplement: supp_136_15_2523__1.pdf [file supp_136_15_2523__1.pdf]

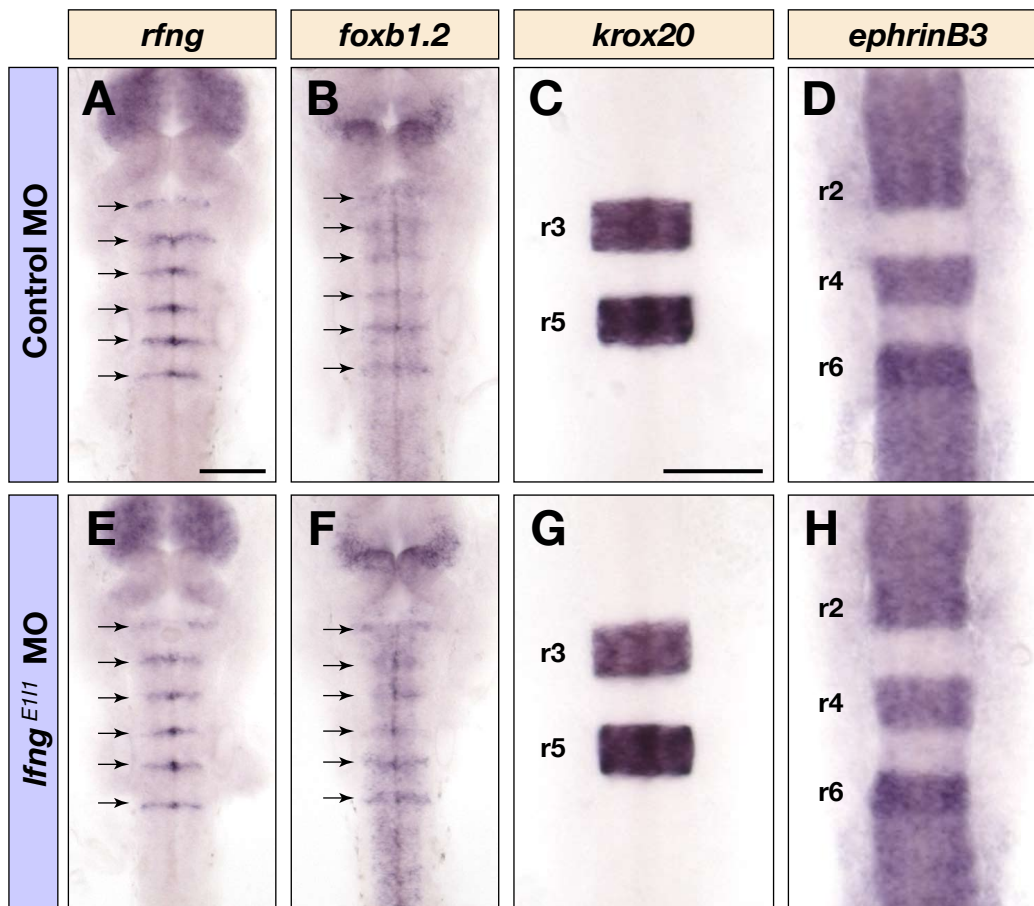

Supplement: supp_136_15_2523__2.pdf [file supp_136_15_2523__2.pdf]

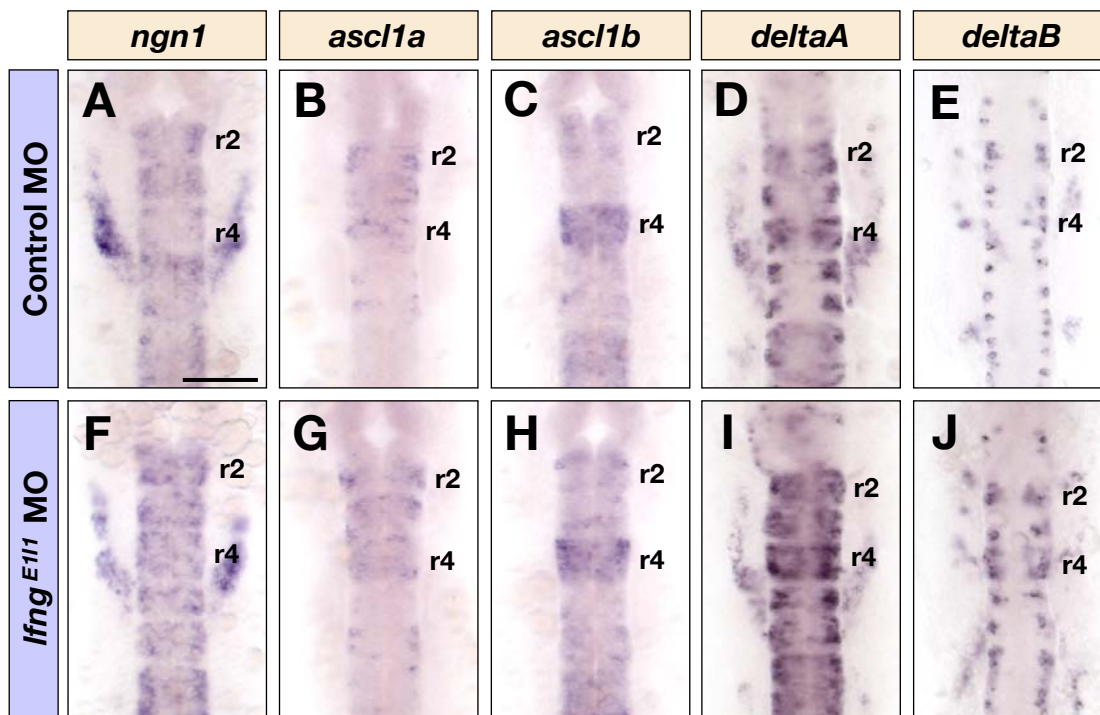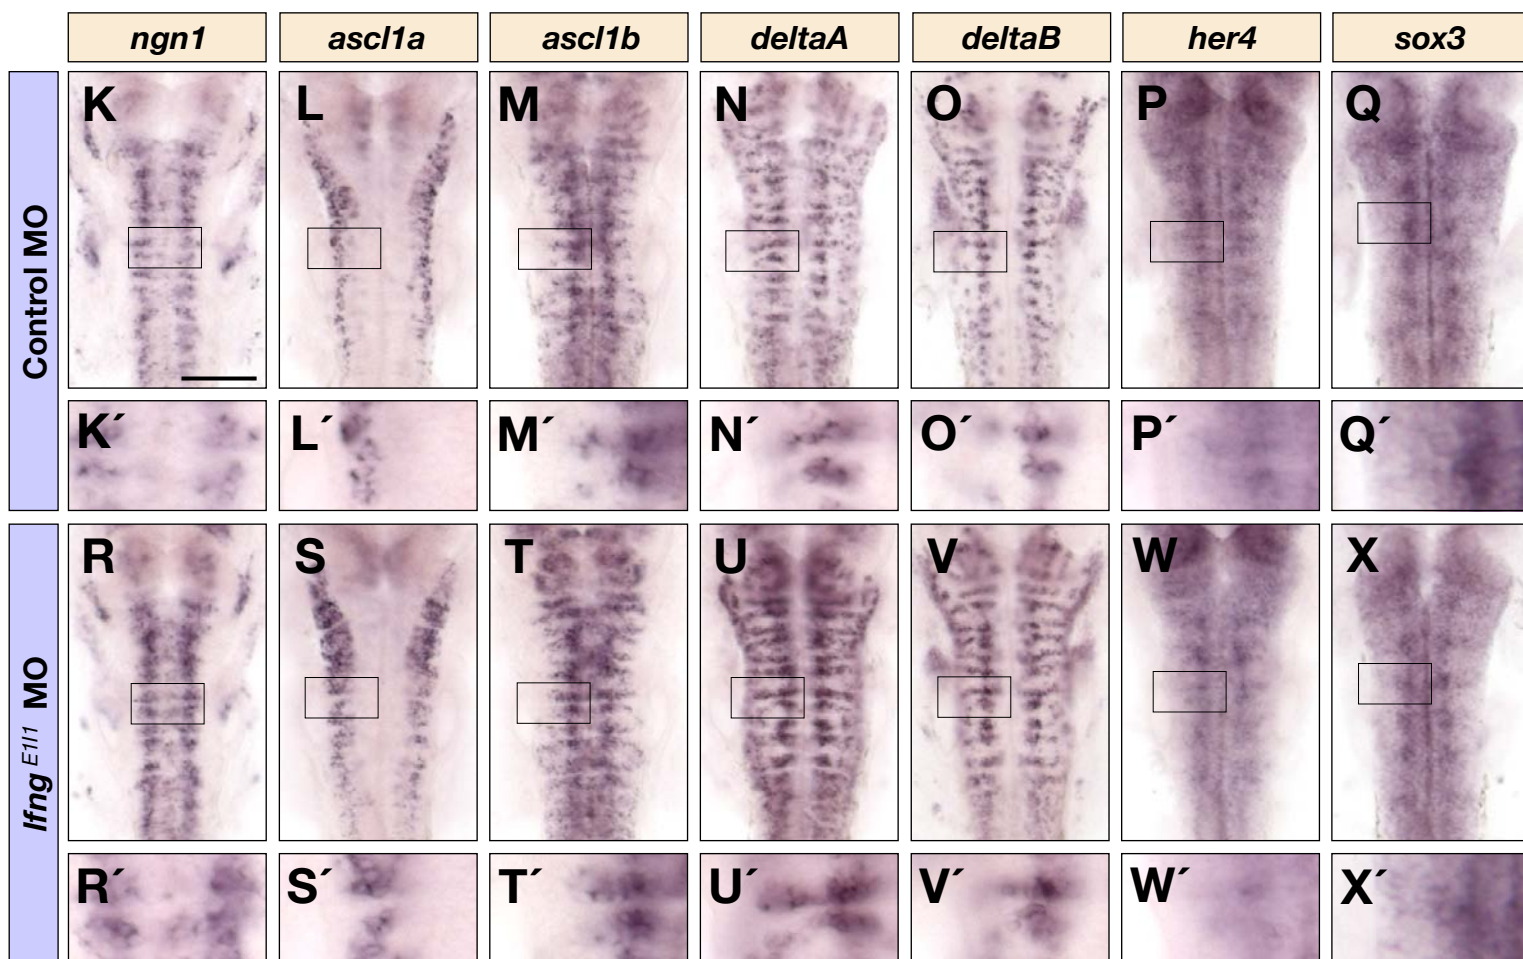

Supplement: supp_136_15_2523__3.pdf [file supp_136_15_2523__3.pdf]

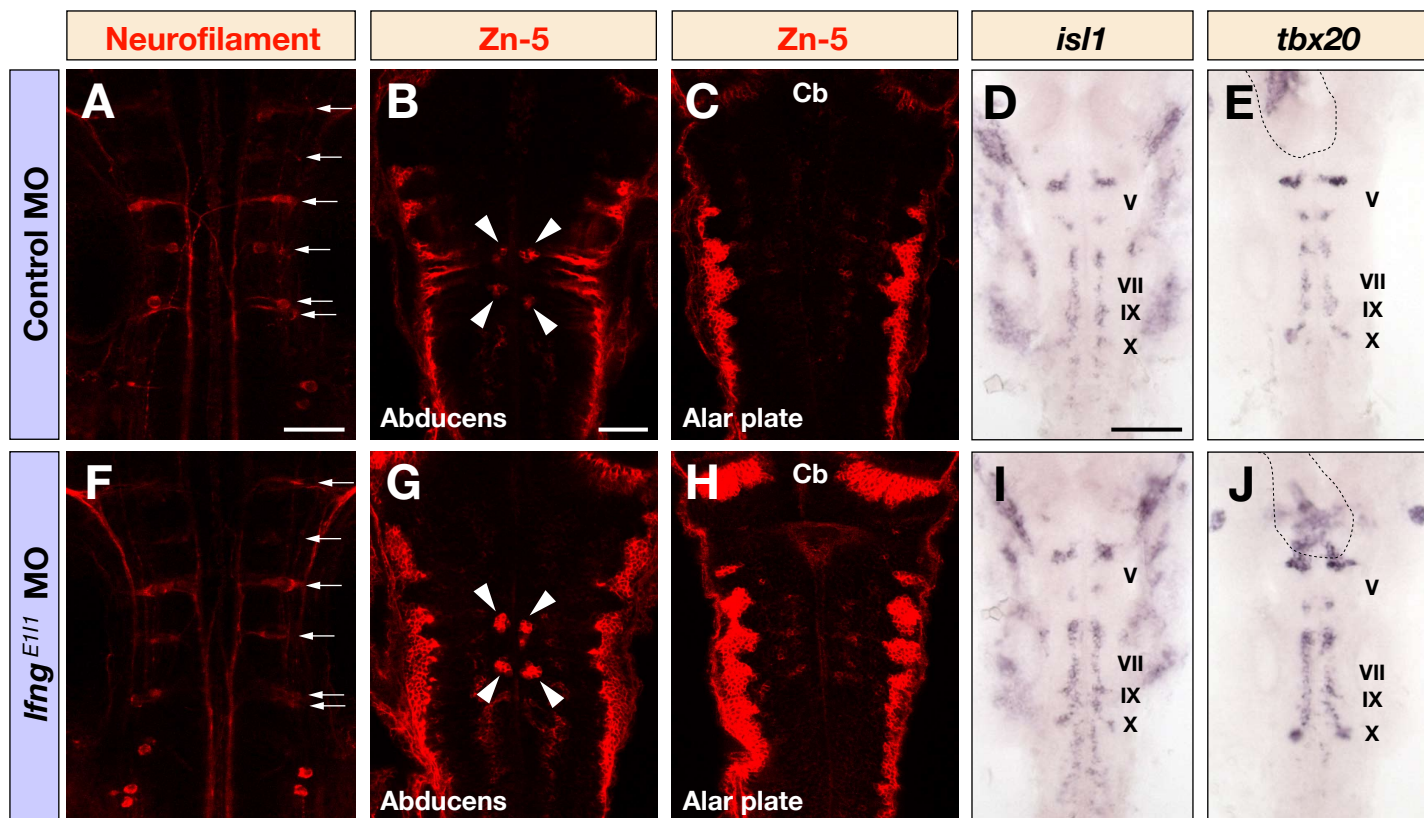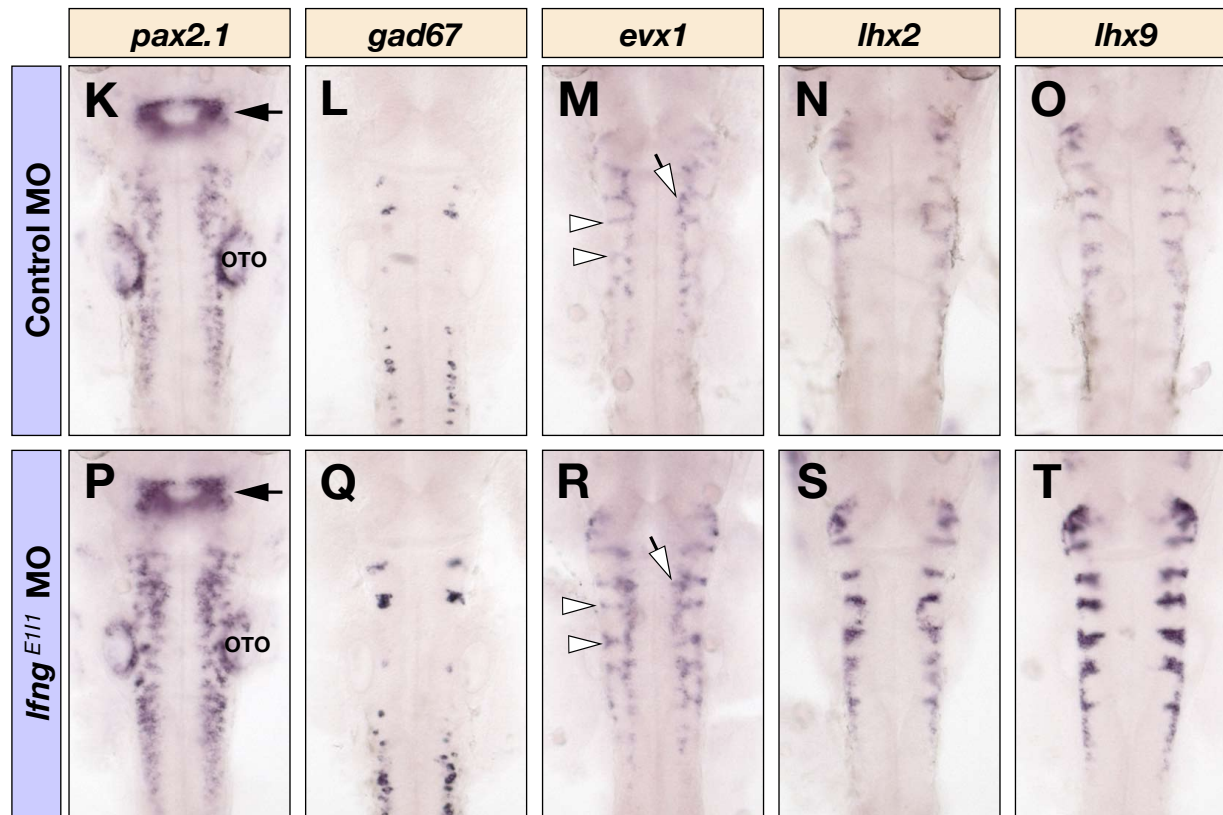

Supplement: supp_136_15_2523__4.pdf [file supp_136_15_2523__4.pdf]

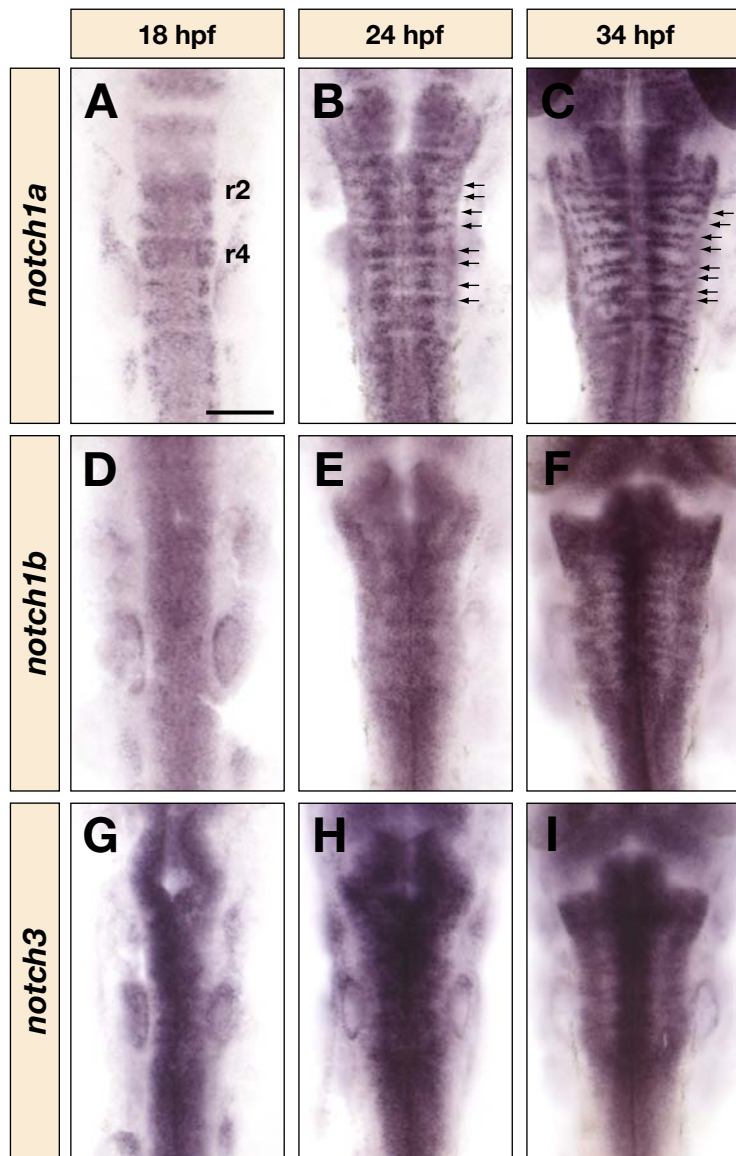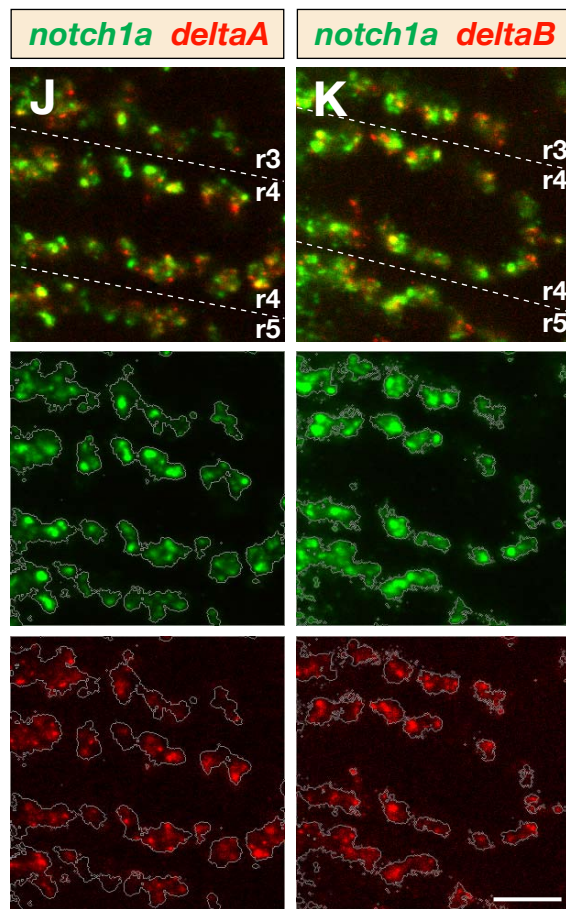

Supplement: supp_136_15_2523__5.pdf [file supp_136_15_2523__5.pdf]

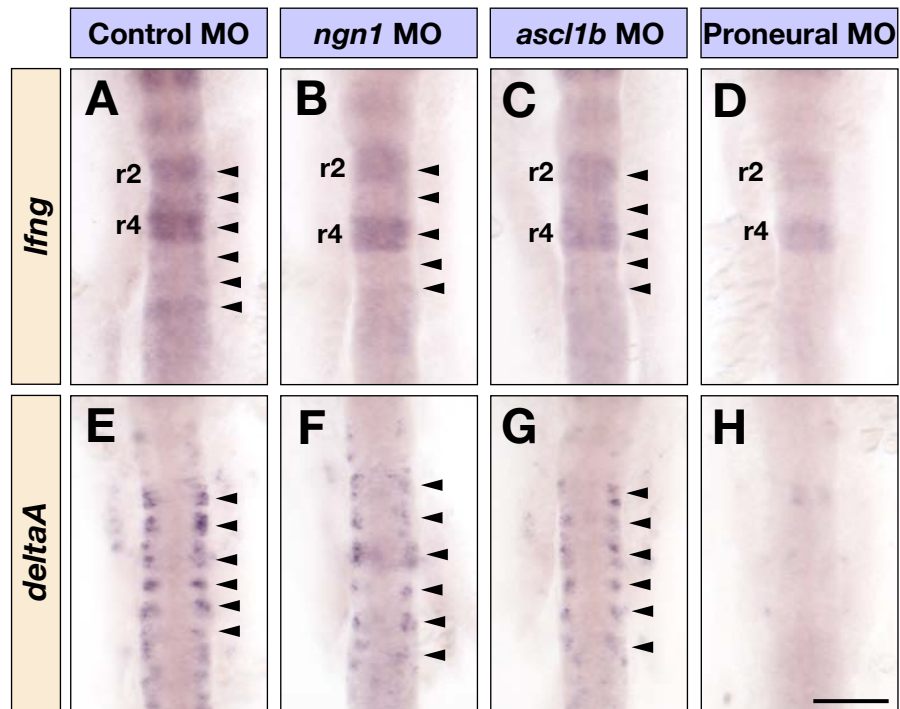

Supplement: supp_136_15_2523__6.pdf [file supp_136_15_2523__6.pdf]
